# Supplementary material
Source: PubMed Central journal article supplement (PMC165848)

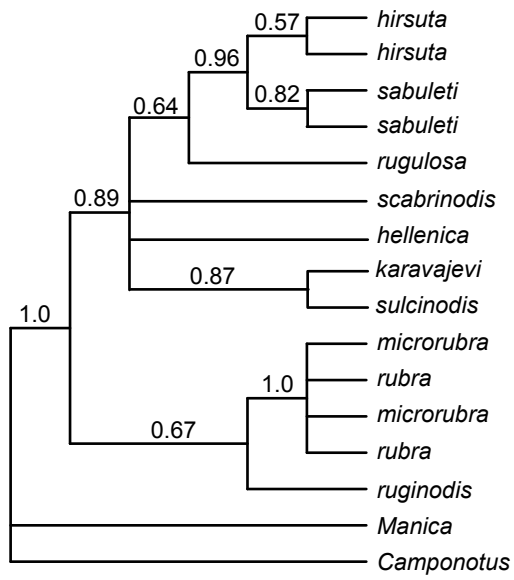

Supplement: pnas_1036825100_3.pdf [file pnas_1036825100_3.pdf]
